# Supplementary material for: Successful control of an extended-spectrum beta-lactamase-producing Klebsiella pneumoniae ST307 outbreak in a neonatal intensive care unit
Source: BMC Infect Dis. 2020 Feb 22;20:166. doi: 10.1186/s12879-020-4889-z (PMC7036245; doi:10.1186/s12879-020-4889-z)
Supplement: Supplementary file 1 — Additional file 1. Case report form and raw data of Klebsiella pneumoniae outbreak, hand hygiene monitoring, and active surveillance cultures. [file 12879_2020_4889_MOESM1_ESM.xlsx]

## Sheet: number,Incidence
Monthly Colonization and Infection Rate
category date	Number of case, patient day etc.									incidence density
	ASC	Clinical specimen	Infection	Colonization	total ESBL-KPN new case	CLABSI	Patient day	Central catheter day	Type of Infection	ASC	Clinical specimen	HAI	Colonization	total ESBL-KPN new case	CLABSI
2017-08-30	0	1	1	0	1	1	488	130	CLABSI	0	2.04918	2.04918	0	2.04918	7.69231
2017-09-30	0	2	2	0	2	2	486	135	CLABSI*2	0	4.11523	4.11523	0	4.11523	14.8148
2017-10-30	0	0	0	0	0		503	74		0	0	0	0	0	0
2017-11-30	0	1	0	1	1	0	489	126	sputum colonizer *1	0	2.04499	0	2.04499	2.04499	0
2017-12-30	0	3	3	0	3	2	499	83	CLABSI*2, NEC*1	0	6.01202	6.01202	0	6.01202	24.0964
2017 total	0	7	6	0	7	5	2465	548		0	2.83976	2.43408	0	2.83976	9.12409
2018-01-01	22	0	0	22	22	0	489	43		44.9898	0	0	44.9898	44.9898	0
2018-02-01	9	1	0	9	9	0	353	5	sputum colonizer *1	25.4958	2.83286	0	25.4958	25.4958	0
2018-03-01	5	0	0	5	5	0	271	6		18.4502	0	0	18.4502	18.4502	0
2018-04-01	0	0	0	0	0	0	417	76		0	0	0	0	0	0
2018-05-01	0	0	0	0	0	0	500	66		0	0	0	0	0	0
2018 total	36	1	0	36	36	0	2030	196		17.734	0.492611	0	17.734	17.734	0

## Sheet: daily new case
	Index
	admission			during of isolation
	After discharge NBR admission			during of hospitalization
	discharge			KPN acquisition at NICU		Clinical specimen	ASC
	Isolation discontinue*			KPN acquisition at NBR†
	* three times negative for surveillance cultures			† Normal baby room
																						ASC start
	date category					2017-08-18	2017-09-05	2017-09-08	2018-09-12	2017-09-29	2017-10-03	2017-11-03	2017-12-11	2017-12-15	2018-12-18	2017-12-29	2018-01-02	1/3(12/29)	2018-01-04	2018-01-05	2018-01-06	2018-01-07	2018-01-08	2018-01-09	2018-01-10	2018-01-11	2018-01-12	2018-01-13	2018-01-14	2018-01-15	2018-01-16	2018-01-17	2018-01-18	2018-01-19	2018-01-20	2018-01-21	2018-01-22	2018-01-23	2018-01-24	2018-01-25	2018-01-26	2018-01-27	2018-01-28	2018-01-29	2018-01-30	2018-01-31	2018-02-01	2018-02-02	2018-02-03
	patient NO	KPN patient NO	ASC positive NO	Clincal specimen positive NO	Date taken until KPN acquisition
	1	1		1, 3	13.4	Clinical specimen				discharge원	Clinical specimen
	2	2		2	38.4			discharge원	Clinical specimen
	3	3	9	4	4							Clinical specimen													ASC								discharge원
	4	4	10	5	12.5								Clinical specimen														ASC
	5	5	11	6	37.4										Clinical specimen												ASC
	6	6		7	20.9											discharge원		Clinical specimen
	7	7	1		2.5												adm.				After discharge NBR admission	discharge원		ASC
	8	8	2		9.3															discharge원				ASC
	10	9	3		221.4																				ASC																							discharge원
	11	10	4		2.5												adm.				After discharge NBR admission	discharge원			ASC
	12	11	5		51.1																				ASC							discharge원
	13	12	6		49.2																				ASC
	14	13	7		196.5																				ASC
	15	14	8	8	51.6																				ASC
	9	19	14		89.5																										ASC																discharge원
	16																adm.			discharge원
	17																		adm.						After discharge NBR admission	discharge원
	20	15	12		62.3																		After discharge NBR admission		discharge원		ASC
	19	16	13		4.4															adm.							ASC																						discharge원
	21	17	15		4.4															adm.							ASC																			discharge원
	18																				adm.				discharge원
	22	18	16		2.4																	adm.			After discharge NBR admission		ASC
	23	34	30		50.4																		adm.
	24	20	17		2.4																				adm.			discharge원			ASC
	25	21	18		3.3																					adm.		After discharge NBR admission		discharge원		ASC
	26	22	19		6.6																					adm.							discharge원	ASC
	27	23	20		6.6																					adm.								ASC	discharge원
	28	25	21		5.3																												adm.								ASC			discharge원
	29	26	22		5.3																												adm.						discharge원		ASC
	30																																adm.								discharge원
	31																																				adm.
	32	27	23		13.4																																		adm.
	33																																								adm.			After discharge NBR admission
	34																																										adm.
	35																																											adm.
	36																																														adm.
	37
	38
	39
	40
	41
	42
	43
	44	28	24		7.5
	45	29	25		7.4
	46	30	26		7.4
	47	31	27		7.4
	48	32	28		7.6
	49	33	29		7.6
	50	35	31		4.4
	51
	52	38	34		4.5
	53	39	35		4.3
	54
	55	40	36		2
	56	41(NBR)	38		4.5
	57
	58
	59
	60	42	39		5.4
	61	43	40		4.6
	62
	63
	64
	65
	66
	67
	68
	69
	70
	71
	72
	73
	74
	75
	76
	77
	78
	79
	80
	81
	82
	83
	84
	85
	86
	87
	88
	89
	90
[truncated: 86 more columns]

## Sheet: HH compliance etc.
category date	Optimal HH compliance			Contact precaution
	number of opportunities	number of observed hand hygiene actions performed	rate	number of opportunities	number of observed actions performed	rate
2017-08-30	43	24	55.814	10	10	100
2017-09-30	19	13	68.4211	11	10	90.9091
2017-10-30	36	22	61.1111	6	3	50
2017-11-30	28	17	60.7143	8	6	75
2017-12-30	32	20	62.5	13	13	100
2017 total	158	96	60.7595	48	42	87.5
2018-01-01	70	47	67.1429	64	62	96.875
2018-02-01	57	45	78.9474	57	56	98.2456
2018-03-01	74	60	81.0811	60	60	100
2018-04-01	70	50	71.4286	45	44	97.7778
2018-05-01	131	101	77.0992	3	3	100
2018 total	402	303	75.3731	229	225	98.2533

## Sheet: HH raw data
ward	date	time	professions 1.nurse 2.nurse-PA 3.Dr. 4.emergency medical technician 5.Medical Laboratory Technologist 6.nurse assistant 7.physiorherapists 8.x-ray technicians 9.cleaning operative 10. Dental hygienist 11.Etc.	Observation Case No.	department	indication	HH Action 1.performed 2.unperformed	HH material 1. alcohol HR 2. HW	HH duration 1.correct 2.Incorrect	6-step 1.correct 2.Incorrect	optimal HH number of opportunities	number of observed optimal HH actions performed	Contact precaution number of opportunities	Contact precaution number of observed actions performed
NICU	2017-10-27	14:40:00	1	1		1	1	1	1	1	1	1	1	1
NICU	2017-10-27	14:40:00	1	1		4	1	1	1	1	1	1	1	0
NICU	2017-10-27	14:40:00	1	1		1	1	1	1	1	1	1	1	1
NICU	2017-10-27	14:50:00	1	1		3	1	1	1	1	1	1	1	1
NICU	2017-10-27	14:50:00	1	1		1	1	1	1	1	1	1	1	0
NICU	2017-10-27	14:50:00	1	1		4	1	1	1	1	1	1	1	0
NICU	2017-10-27	14:50:00	1	1		3	1	1	1	1	1	1
NICU	2017-10-27	14:50:00	1	1		3	1	1	1	1	1	1
NICU	2017-10-27	14:35:00	1	2		2	1	1	1	1	1	1
NICU	2017-10-27	14:30:00	1	3		1	1	1	1	1	1	1
NICU	2017-10-27	14:40:00	1	3		1	1	1	1	1	1	1
NICU	2017-10-27	14:40:00	1	3		4	1	1	1	1	1	1
NICU	2017-10-27	14:35:00	1	4		1	1	1	1	1	1	1
NICU	2017-10-27	14:35:00	1	4		4	1	1	1	1	1	1
NICU	2017-10-27	14:35:00	1	4		2	1	1	1	1	1	1
NICU	2017-10-27	14:35:00	1	4		4	1	1	1	1	1	1
NICU	2017-10-27	14:35:00	1	4		1	1	1	1	1	1	1
NICU	2017-10-27	14:35:00	1	4		3	1	1	1	1	1	1
NICU	2017-10-27	14:35:00	1	4		3	1	2	1	1	1	1
NICU	2017-08-08	09:45:00	1	5		4	1	1	1	1	1	1
NICU	2017-08-08	09:45:00	1	5		5	1	1	1	1	1	1
NICU	2017-08-08	09:45:00	1	5		1	1	1	1	1	1	1
NICU	2017-08-08	09:30:00	1	6		1	1	1	1	1	1	1
NICU	2017-08-08	09:45:00	1	6		4	1	1	1	1	1	1
NICU	2017-08-08	09:45:00	1	6		4	1	1	1	1	1	1
NICU	2017-08-08	09:45:00	1	6		1	1	1	1	1	1	1
NICU	2017-08-08	09:30:00	1	7		4	1	1	1	1	1	1
NICU	2017-08-08	09:30:00	1	7		5	1	1	1	1	1	1
NICU	2017-08-08	09:30:00	1	8		1	1	2	1	1	1	1
NICU	2017-08-08	09:45:00	1	8		4	1	1	1	1	1	1
NICU	2017-08-08	09:45:00	1	8		1	1	1	1	1	1	1
NICU	2017-08-10	10:25:00	1	9		5	1	1	1	1	1	1
NICU	2017-08-10	10:25:00	1	9		5	1	1	1	1	1	1
NICU	2017-08-10	10:25:00	1	9		1	1	1	1	1	1	1
NICU	2017-08-10	10:25:00	1	10		5	1	1	1	1	1	1
NICU	2017-08-10	10:25:00	1	11		2	1	1	1	1	1	1
NICU	2017-08-10	10:25:00	1	11		4	1	1	1	1	1	1
NICU	2017-08-10	10:25:00	1	11		4	1	1	1	1	1	1
NICU	2017-09-21	10:00:00	1	12		3	1	1	1	1	1	1
NICU	2017-09-21	10:00:00	1	12		4	1	1	1	1	1	1
NICU	2017-09-21	10:00:00	1	12		4	1	2	1	1	1	1
NICU	2017-09-21	10:00:00	1	13		1	1	1	1	1	1	1
NICU	2017-09-21	10:00:00	1	13		1	1	1	1	1	1	1
NICU	2017-09-21	10:00:00	1	14		4	1	1	1	1	1	1	1	1
NICU	2017-09-21	10:00:00	1	14		4	1	1	1	1	1	1	1	1
NICU	2017-09-21	10:00:00	1	14		4	1	1	1	1	1	1	1	1
NICU	2017-09-21	10:00:00	1	15		4	1	1	1	1	1	1	1	1
NICU	2017-09-21	10:00:00	1	15		3	1	2	1	1	1	1	1	1
NICU	2017-09-21	10:00:00	1	16		3	1	1	1	1	1	1	1	1
NICU	2017-09-21	10:00:00	1	16		5	1	1	1	1	1	1	1	1
NICU	2017-09-21	10:00:00	1	16		1	1	2	1	1	1	1	1	1
NICU	2017-09-21	10:00:00	1	17		2	1	1	2	2	1	0	1	1
NICU	2017-09-21	10:00:00	1	17		2	1	1	2	2	1	0	1	1
NICU	2017-09-21	10:00:00	1	17		1	1	1	2	2	1	0	1	0
NICU	2017-09-21	10:00:00	1	18		4	1	1	2	2	1	0
NICU	2017-09-21	10:00:00	1	18		5	1	1	2	2	1	0
NICU	2017-09-21	10:00:00	1	19		2	1	1	2	2	1	0
NICU	2017-10-27	14:40:00	1	20		3	1	1	1	1	1	1
NICU	2017-10-27	14:50:00	1	20		1	1	1	1	1	1	1
NICU	2017-10-27	14:50:00	1	20		4	1	1	1	1	1	1
NICU	2017-10-27	14:30:00	1	21		1	1	1	2	2	1	0
NICU	2017-10-27	14:50:00	1	21		3	1	1	2	2	1	0
NICU	2017-10-27	14:35:00	1	22		3	1	1	2	2	1	0
NICU	2017-10-27	14:35:00	1	22		3	1	1	2	2	1	0
NICU	2017-10-27	14:35:00	1	22		2	1	1	2	2	1	0
NICU	2017-10-27	14:30:00	1	23		1	1	1	2	2	1	0
NICU	2017-10-27	14:30:00	1	23		4	1	1	2	2	1	0
NICU	2017-10-27	14:35:00	1	24		3	1	1	2	2	1	0
NICU	2017-10-27	14:35:00	1	25		1	2				1	0
NICU	2017-10-27	14:30:00	1	25		2	2				1	0
NICU	2017-10-27	14:30:00	1	25		3	2				1	0
NICU	2017-10-27	14:35:00	1	25		3	2				1	0
NICU	2017-10-27	14:30:00	1	26		4	2				1	0
NICU	2017-10-27	14:30:00	1	27		5	2				1	0
NICU	2017-11-15	10:00:00	1	28		1	1	1	1	1	1	1
NICU	2017-11-15	10:00:00	1	28		5	1	1	1	1	1	1
NICU	2017-11-15	10:00:00	1	28		5	1	1	1	1	1	1
NICU	2017-11-15	10:00:00	1	29		1	1	1	1	1	1	1	1	1
NICU	2017-11-15	10:00:00	1	29		4	1	1	1	1	1	1	1	1
NICU	2017-11-28	11:25:00	1	29		4	1	2	1	1	1	1	1	1
NICU	2017-11-15	10:00:00	1	30		5	1	1	1	1	1	1	1	0
NICU	2017-11-15	10:00:00	1	31		1	1	1	1	1	1	1	1	0
NICU	2017-11-27	10:30:00	1	32		1	1	1	1	1	1	1	1	1
NICU	2017-11-27	10:30:00	1	32		3	1	1	1	1	1	1	1	1
NICU	2017-11-27	10:30:00	1	32		2	1	1	1	1	1	1	1	1
NICU	2017-11-27	10:30:00	1	32		4	1	1	1	1	1	1
NICU	2017-11-27	10:30:00	1	33		5	1	1	1	1	1	1
NICU	2017-11-27	10:30:00	1	34		4	1	1	1	1	1	1
NICU	2017-11-27	10:30:00	2	35	PD	2	1	1	1	1	1	1
NICU	2017-11-28	11:25:00	2	36	PD	4	1	2	1	1	1	1
NICU	2017-11-28	11:25:00	2	36	PD	3	1	2	1	1	1	1
NICU	2017-11-27	10:30:00	1	37		5	1	1	2	2	1	0
NICU	2017-11-27	10:30:00	1	37		1	1	1	2	2	1	0
NICU	2017-11-27	10:30:00	1	37		1	1	1	2	2	1	0
NICU	2017-11-27	10:30:00	1	37		5	1	1	2	2	1	0
NICU	2017-11-27	10:30:00	1	37		4	1	1	2	2	1	0
NICU	2017-11-28	11:25:00	1	38		4	1	1	2	2	1	0
NICU	2017-11-15	10:00:00	1	39		4	1	2	2	2	1	0
NICU	2017-11-27	10:30:00	1	40		3	1	1	2	2	1	0
NICU	2017-11-27	10:30:00	1	41		2	1	1	2	2	1	0
NICU	2017-11-27	10:30:00	2	42	PD	1	1	1	2	2	1	0
NICU	2017-11-27	10:30:00	3	43	PD	5	1	1	2	2	1	0
NICU	2017-12-27	15:30:00	1	44		3	1	1	1	1	1	1
NICU	2017-12-27	15:30:00	1	44		3	1	1	1	1	1	1
NICU	2017-12-27	15:30:00	1	44		1	1	1	1	1	1	1
NICU	2017-12-27	15:30:00	1	44		4	1	1	1	1	1	1
NICU	2017-12-27	15:30:00	1	44		4	1	2	1	1	1	1
NICU	2017-12-27	15:30:00	1	45		1	1	1	1	1	1	1
NICU	2017-12-27	15:30:00	1	45		4	1	1	1	1	1	1
NICU	2017-12-27	15:30:00	1	45		4	1	1	1	1	1	1
NICU	2017-12-27	15:30:00	1	46		1	1	1	1	1	1	1
NICU	2017-12-27	15:30:00	1	46		4	1	1	1	1	1	1
NICU	2017-12-27	15:30:00	1	46		2	1	1	1	1	1	1
NICU	2017-12-27	15:30:00	1	46		3	1	1	1	1	1	1
NICU	2017-12-27	15:30:00	1	47		4	1	2	1	1	1	1
NICU	2017-12-27	15:30:00	1	48		1	1	1	1	1	1	1
NICU	2017-12-27	15:30:00	1	48		1	1	1	1	1	1	1
NICU	2017-12-27	15:30:00	1	48		4	1	1	1	1	1	1
NICU	2017-12-27	15:30:00	1	49		4	1	1	1	1	1	1
NICU	2017-12-27	15:30:00	2	50	PD	4	1	1	1	1	1	1	1	1
NICU	2017-12-27	15:30:00	2	50	PD	4	1	1	1	1	1	1	1	1
NICU	2017-12-27	15:30:00	3	51	RAD	1	1	1	1	1	1	1	1	1
NICU	2017-12-27	15:30:00	1	52		3	1	1	2	2	1	0	1	1
NICU	2017-12-27	15:30:00	1	52		5	1	1	2	2	1	0	1	1
NICU	2017-12-27	15:30:00	1	53		4	1	1	2	2	1	0	1	1
NICU	2017-12-27	15:30:00	1	54		4	1	1	2	2	1	0	1	1
NICU	2017-12-27	15:30:00	1	55		1	1	1	2	2	1	0	1	1
NICU	2017-12-27	15:30:00	1	55		4	1	1	2	2	1	0	1	1
NICU	2017-12-27	15:30:00	1	55		1	1	1	2	2	1	0	1	1
NICU	2017-12-27	15:30:00	1	55		3	1	2	2	2	1	0	1	1
NICU	2017-12-27	15:30:00	1	56		4	1	1	2	2	1	0	1	1
NICU	2017-12-27	15:30:00	1	56		1	1	1	2	2	1	0	1	1
NICU	2017-12-27	15:30:00	1	57		4	1	1	2	2	1	0
NICU	2017-12-27	15:30:00	3	58	RAD	4	1	2	2	2	1	0
NICU	2017-08-08	09:30:00	3	59	EY	3	1	1	1	1	1	1
NICU	2017-08-08	09:45:00	3	59	EY	3	1	1	1	1	1	1
NICU	2017-08-08	09:30:00	1	60		1	1	1	1	1	1	1
NICU	2017-08-08	09:30:00	1	60		4	1	2	1	1	1	1
NICU	2017-08-08	09:30:00	1	60		1	1	1	1	1	1	1
NICU	2017-08-08	09:30:00	3	61	EY	4	1	1	2	2	1	0
NICU	2017-08-08	09:45:00	3	61	EY	4	1	1	2	2	1	0
NICU	2017-08-08	09:30:00	1	62		4	1	1	2	2	1	0
NICU	2017-08-08	09:30:00	1	63		5	1	1	2	2	1	0
NICU	2017-08-08	09:30:00	1	63		4	1	1	2	2	1	0
NICU	2017-08-08	09:30:00	1	64		1	1	1	2	2	1	0	1	1
NICU	2017-08-08	09:30:00	1	64		1	1	1	2	2	1	0	1	1
NICU	2017-08-08	09:45:00	1	64		1	1	1	2	2	1	0	1	1
NICU	2017-08-10	10:25:00	1	65		1	1	1	2	2	1	0	1	1
NICU	2017-08-10	10:25:00	1	65		1	1	1	2	2	1	0	1	1
NICU	2017-08-10	10:25:00	1	65		4	1	1	2	2	1	0	1	1
NICU	2017-08-10	10:25:00	1	66		3	1	1	2	2	1	0	1	1
NICU	2017-08-10	10:25:00	1	66		4	1	1	2	2	1	0	1	1
NICU	2017-08-10	10:25:00	1	67		4	1	1	2	2	1	0	1	1
NICU	2017-08-10	10:25:00	1	67		5	1	1	2	2	1	0	1	1
NICU	2017-08-10	10:25:00	1	67		1	1	1	2	2	1	0
NICU	2017-08-10	10:25:00	1	67		5	1	1	2	2	1	0
NICU	2017-08-10	10:25:00	1	67		5	1	1	2	2	1	0
NICU	2017-08-10	10:25:00	1	67		4	1	1	2	2	1	0
NICU	2018-01-19	15:00:00	1	68		3	1	1	1	1	1	1	1	1
NICU	2018-01-19	15:00:00	1	68		3	1	2	1	1	1	1	1	1
NICU	2018-01-25	14:30:00	1	69		5	1	2	2	2	1	0	1	1
NICU	2018-01-25	14:30:00	1	70		5	1	2	1	1	1	1	1	0
NICU	2018-01-12	16:00:00	1	71		4	1	2	1	1	1	1	1	1
NICU	2018-01-11	11:00:00	1	71		4	1	1	1	1	1	1	1	1
NICU	2018-01-11	11:00:00	1	71		4	1	1	1	1	1	1	1	1
NICU	2018-01-25	14:30:00	1	72		4	1	2	1	1	1	1	1	1
NICU	2018-01-25	14:30:00	1	72		4	1	2	1	1	1	1	1	1
NICU	2018-01-19	15:00:00	1	73		1	1	2	1	1	1	1	1	1
NICU	2018-01-19	15:00:00	1	73		4	1	2	1	1	1	1	1	1
NICU	2018-01-25	14:30:00	1	74		1	1	1	2	2	1	0	1	1
NICU	2018-01-12	16:00:00	1	75		5	1	1	1	1	1	1	1	1
NICU	2018-01-19	15:00:00	1	76		4	1	2	1	1	1	1	1	1
NICU	2018-01-19	15:00:00	1	77		1	1	1	1	1	1	1	1	1
NICU	2018-01-19	15:00:00	1	77		4	1	1	1	1	1	1	1	1
NICU	2018-01-12	16:00:00	2	78	NICU	4	1	2	1	1	1	1	1	1
NICU	2018-01-12	16:00:00	2	79	NICU	4	1	2	1	1	1	1	1	1
NICU	2018-01-19	15:00:00	2	79	NICU	1	1	2	1	1	1	1	1	1
NICU	2018-01-19	15:00:00	1	80		4	1	1	1	1	1	1	1	1
NICU	2018-01-25	14:30:00	1	81		3	2				1	0	1	0
NICU	2018-01-25	14:30:00	1	81									1	1
NICU	2018-01-25	14:30:00	1	82									1	1
NICU	2018-01-11	11:00:00	1	83									1	1
NICU	2018-01-25	14:30:00	1	84									1	1
NICU	2018-01-04	14:00:00	2	85	NICU	2	1	2	2	2	1	0	1	1
NICU	2018-01-04	14:00:00	1	86		5	1	1	2	2	1	0	1	1
NICU	2018-01-04	14:00:00	2	87	NICU	2	1	2	2	2	1	0	1	1
NICU	2018-01-04	14:00:00	1	88		3	1	2	2	2	1	0	1	1
NICU	2018-01-19	15:00:00	1	89		5	1	2	1	1	1	1	1	1
NICU	2018-01-19	15:00:00	1	89		4	1	2	1	1	1	1	1	1
NICU	2018-01-25	14:30:00	1	90		4	1	2	1	1	1	1	1	1
NICU	2018-01-04	14:00:00	2	91	NICU	2	1	1	2	2	1	0	1	1
NICU	2018-01-04	14:00:00	1	92		4	1	1	2	2	1	0	1	1
NICU	2018-01-04	14:00:00	1	93		2	1	1	1	1	1	1	1	1
NICU	2018-01-12	16:00:00	1	94		4	1	2	1	1	1	1	1	1
NICU	2018-01-19	15:00:00	1	95		4	1	2	1	1	1	1	1	1
NICU	2018-01-11	11:00:00	1	96		2	1	1	1	1	1	1	1	1
NICU	2018-01-11	11:00:00	1	96		1	1	1	2	2	1	0	1	1
NICU	2018-01-11	11:00:00	1	96		4	1	1	2	2	1	0	1	1
NICU	2018-01-04	14:00:00	1	97		1	1	1	2	2	1	0	1	1
NICU	2018-01-19	15:00:00	1	98		3	1	1	1	1	1	1	1	1
NICU	2018-01-19	15:00:00	1	98		5	1	1	1	1	1	1	1	1
NICU	2018-01-19	15:00:00	1	98		4	1	2	1	1	1	1	1	1
NICU	2018-01-19	15:00:00	1	98		4	1	1	1	1	1	1	1	1
NICU	2018-01-04	14:00:00	1	98		1	1	1	2	2	1	0	1	1
NICU	2018-01-25	14:30:00	1	99		5	1	2	1	1	1	1	1	1
NICU	2018-01-12	16:00:00	1	100		4	1	2	1	1	1	1	1	1
NICU	2018-01-25	14:30:00	1	100		5	1	2	1	1	1	1	1	1
NICU	2018-01-25	14:30:00	1	100		1	1	1	1	1	1	1	1	1
NICU	2018-01-12	16:00:00	1	101		5	1	1	1	1	1	1	1	1
NICU	2018-01-12	16:00:00	1	101		4	1	2	1	1	1	1	1	1
NICU	2018-01-12	16:00:00	1	101		1	1	1	1	1	1	1	1	1
NICU	2018-01-12	16:00:00	1	101		4	1	2	1	1	1	1	1	1
NICU	2018-01-12	16:00:00	1	101		4	1	2	1	1	1	1	1	1
NICU	2018-01-11	11:00:00	1	102		5	1	1	1	1	1	1	1	1
NICU	2018-01-04	14:00:00	1	103		4	1	2	2	2	1	0	1	1
NICU	2018-01-25	14:30:00	1	104		4	1	2	1	1	1	1	1	1
NICU	2018-01-04	14:00:00	1	105		4	1	1	2	2	1	0	1	1
NICU	2018-01-04	14:00:00	1	105		1	1	1	2	2	1	0	1	1
NICU	2018-01-12	16:00:00	2	106	NICU	5	1	1	2	2	1	0	1	1
NICU	2018-01-04	14:00:00	2	106	NICU	4	1	1	1	1	1	1	1	1
NICU	2018-01-04	14:00:00	2	106	NICU	2	1	1	2	2	1	0	1	1
NICU	2018-01-19	15:00:00	2	107	NICU	4	1	2	1	1	1	1	1	1
NICU	2018-01-19	15:00:00	2	107	NICU	4	1	2	1	1	1	1
NICU	2018-01-04	14:00:00	2	107	NICU	4	1	1	2	2	1	0
NICU	2018-01-12	16:00:00	2	108	NICU	4	1	1	1	1	1	1
NICU	2018-01-12	16:00:00	2	108	NICU	5	1	1	1	1	1	1
NICU	2018-01-12	16:00:00	3	109	PD	1	1	1	1	1	1	1
NICU	2018-01-12	16:00:00	3	109	PD	4	1	2	1	1	1	1
NICU	2018-01-04	14:00:00	1	110		2	2				1	0
NICU	2018-01-04	14:00:00	1	111		5	2				1	0
NICU	2018-01-11	11:00:00	1	112		5	2				1	0
NICU	2018-01-11	11:00:00	1	112		5	2				1	0
NICU	2018-02-20	14:35:00	1	113		1	1	1	2	2	1	0	1	1
NICU	2018-02-07	15:20:00	1	114		1	1	1	1	1	1	1	1	1
NICU	2018-02-07	15:20:00	1	115		1	1	1	1	1	1	1	1	1
NICU	2018-02-07	15:20:00	1	115		1	1	1	2	2	1	0	1	1
NICU	2018-02-03	16:30:00	1	116		4	1	2	1	1	1	1	1	1
NICU	2018-02-03	16:30:00	1	117		4	1	2	1	1	1	1	1	1
NICU	2018-02-22	10:30:00	1	118		3	1	1	1	1	1	1	1	1
NICU	2018-02-22	10:30:00	1	118		4	1	2	1	1	1	1	1	1
NICU	2018-02-22	10:30:00	1	118		1	1	1	1	1	1	1	1	1
NICU	2018-02-20	14:35:00	1	119		2	1	1	1	1	1	1	1	1
NICU	2018-02-20	14:35:00	1	119		4	1	1	1	1	1	1	1	1
NICU	2018-02-20	14:35:00	1	119		3	1	1	2	1	1	0	1	1
NICU	2018-02-22	10:30:00	1	120		3	1	2	1	1	1	1	1	1
NICU	2018-02-22	10:30:00	1	120		3	1	2	1	1	1	1	1	1
NICU	2018-02-22	10:30:00	2	121	NICU	2	1	2	1	1	1	1	1	1
NICU	2018-02-07	15:20:00	3	122	NICU	1	1	1	2	2	1	0	1	0
NICU	2018-02-07	15:20:00	1	123									1	1
NICU	2018-02-07	15:20:00	1	124									1	1
NICU	2018-02-20	14:35:00	1	125									1	1
NICU	2018-02-07	15:20:00	2	126	NICU								1	1
NICU	2018-02-20	14:35:00	1	127		5	1	2	1	1	1	1	1	1
NICU	2018-02-20	14:35:00	1	127		1	1	2	1	1	1	1	1	1
NICU	2018-02-20	14:35:00	1	127		2	1	1	1	1	1	1	1	1
NICU	2018-02-20	14:35:00	1	127		2	1	1	2	2	1	0	1	1
NICU	2018-02-07	15:20:00	1	128		4	1	2	1	1	1	1	1	1
NICU	2018-02-20	14:35:00	1	128		1	1	1	1	1	1	1	1	1
NICU	2018-02-20	14:35:00	1	128		5	1	2	1	1	1	1	1	1
NICU	2018-02-03	16:30:00	1	128		4	1	2	1	1	1	1	1	1
NICU	2018-02-22	10:30:00	1	129		4	1	1	1	1	1	1	1	1
NICU	2018-02-22	10:30:00	1	129		4	1	1	1	1	1	1	1	1
NICU	2018-02-07	15:20:00	1	130		3	1	2	1	1	1	1	1	1
NICU	2018-02-07	15:20:00	1	130		3	1	2	1	1	1	1	1	1
NICU	2018-02-07	15:20:00	1	131		4	1	2	1	1	1	1	1	1
NICU	2018-02-03	16:30:00	1	131		1	1	2	1	1	1	1	1	1
NICU	2018-02-07	15:20:00	1	132		4	1	2	1	1	1	1	1	1
NICU	2018-02-07	15:20:00	1	132		2	1	1	2	2	1	0	1	1
NICU	2018-02-03	16:30:00	1	133		1	1	1	1	1	1	1	1	1
NICU	2018-02-03	16:30:00	1	133		4	1	1	1	1	1	1	1	1
NICU	2018-02-22	10:30:00	1	134		5	1	2	1	1	1	1	1	1
NICU	2018-02-22	10:30:00	1	134		4	1	2	1	1	1	1	1	1
NICU	2018-02-07	15:20:00	1	135		4	1	2	1	1	1	1	1	1
NICU	2018-02-07	15:20:00	1	135		1	1	2	1	1	1	1	1	1
NICU	2018-02-20	14:35:00	1	135		4	1	2	1	1	1	1	1	1
NICU	2018-02-02	10:00:00	1	135		5	1	1	1	1	1	1	1	1
NICU	2018-02-02	10:00:00	1	135		5	1	1	1	1	1	1	1	1
NICU	2018-02-02	10:00:00	1	135		5	1	1	1	1	1	1	1	1
NICU	2018-02-07	15:20:00	1	135		5	1	1	2	2	1	0	1	1
NICU	2018-02-20	14:35:00	1	135		1	1	1	2	2	1	0	1	1
NICU	2018-02-20	14:35:00	1	136		1	1	1	1	1	1	1	1	1
NICU	2018-02-20	14:35:00	1	136		3	1	2	1	1	1	1	1	1
NICU	2018-02-03	16:30:00	1	137		4	1	2	1	1	1	1	1	1
NICU	2018-02-22	10:30:00	1	138		4	1	2	1	1	1	1	1	1
NICU	2018-02-20	14:35:00	1	139		4	1	2	1	1	1	1	1	1
NICU	2018-02-03	16:30:00	1	139		4	1	2	1	1	1	1	1	1
NICU	2018-02-20	14:35:00	1	139		3	1	1	2	2	1	0	1	1
NICU	2018-02-07	15:20:00	2	140	NICU	3	1	2	1	1	1	1	1	1
NICU	2018-02-03	16:30:00	2	141	NICU	1	1	1	1	1	1	1	1	1
NICU	2018-02-22	10:30:00	2	142	NICU	3	1	2	1	1	1	1
NICU	2018-02-07	15:20:00	3	143	NICU	4	1	1	2	2	1	0
NICU	2018-02-03	16:30:00	1	144		3	2				1	0
NICU	2018-02-07	15:20:00	1	145		5	2				1	0
NICU	2018-03-02	16:30:00	1	146		1	1	1	1	1	1	1	1	1
NICU	2018-03-13	14:50:00	1	147		4	1	2	1	1	1	1	1	1
NICU	2018-03-13	14:50:00	1	147		2	1	2	1	1	1	1	1	1
NICU	2018-03-02	16:30:00	1	148		1	1	1	1	1	1	1	1	1
NICU	2018-03-02	16:30:00	1	148		3	1	1	1	1	1	1	1	1
NICU	2018-03-02	16:30:00	6	149		3	1	1	1	1	1	1	1	1
NICU	2018-03-02	16:30:00	6	149		3	1	1	1	1	1	1	1	1
NICU	2018-03-02	16:30:00	6	149		3	1	1	1	1	1	1	1	1
NICU	2018-03-02	16:30:00	6	149		3	1	1	1	1	1	1	1	1
NICU	2018-03-13	14:50:00	2	150	PD	2	1	1	2	2	1	0	1	1
NICU	2018-03-08	14:30:00	1	151		2	1	1	1	1	1	1	1	1
NICU	2018-03-02	16:30:00	1	152		2	1	1	1	1	1	1	1	1
NICU	2018-03-02	16:30:00	1	152		3	1	1	1	1	1	1	1	1
NICU	2018-03-02	16:30:00	1	152		3	1	1	1	1	1	1	1	1
NICU	2018-03-13	14:50:00	1	153		4	1	2	1	1	1	1	1	1
NICU	2018-03-13	14:50:00	1	153		2	1	2	1	1	1	1	1	1
NICU	2018-03-13	14:50:00	1	153		3	1	1	2	2	1	0	1	1
NICU	2018-03-08	14:30:00	1	154		1	1	1	1	1	1	1	1	1
NICU	2018-03-08	14:30:00	1	154		3	1	1	1	1	1	1	1	1
NICU	2018-03-08	14:30:00	1	154		3	1	1	1	1	1	1	1	1
NICU	2018-03-08	14:30:00	1	154		4	1	2	2	2	1	0	1	1
NICU	2018-03-13	14:50:00	1	155									1	1
NICU	2018-03-02	16:30:00	1	156									1	1
NICU	2018-03-13	14:50:00	1	157									1	1
NICU	2018-03-13	14:50:00	1	157									1	1
NICU	2018-03-02	16:30:00	1	158		5	1	2	1	1	1	1	1	1
NICU	2018-03-02	16:30:00	1	158		3	1	2	1	1	1	1	1	1
NICU	2018-03-02	17:00:00	1	158		2	1	1	1	1	1	1	1	1
NICU	2018-03-02	17:00:00	1	158		2	1	1	1	1	1	1	1	1
NICU	2018-03-13	14:50:00	1	159		4	1	2	1	1	1	1	1	1
NICU	2018-03-08	14:30:00	1	160		3	1	1	1	1	1	1	1	1
NICU	2018-03-08	14:30:00	1	160		1	1	2	1	1	1	1	1	1
NICU	2018-03-08	14:30:00	1	160		3	1	1	1	1	1	1	1	1
NICU	2018-03-16	10:00:00	1	161		3	1	2	1	1	1	1	1	1
NICU	2018-03-16	10:00:00	1	161		4	1	1	1	1	1	1	1	1
NICU	2018-03-16	10:00:00	1	161		4	1	2	1	1	1	1	1	1
NICU	2018-03-16	10:00:00	1	161		4	1	2	1	1	1	1	1	1
NICU	2018-03-16	10:00:00	1	161		4	1	2	1	1	1	1	1	1
NICU	2018-03-02	17:00:00	1	162		2	1	1	1	1	1	1	1	1
NICU	2018-03-02	17:00:00	1	162		2	1	1	1	1	1	1	1	1
NICU	2018-03-02	16:30:00	1	163		3	1	1	1	1	1	1	1	1
NICU	2018-03-02	17:00:00	1	163		3	1	1	1	1	1	1	1	1
NICU	2018-03-02	17:00:00	1	163		3	1	2	1	1	1	1	1	1
NICU	2018-03-16	10:00:00	1	163		4	1	1	1	1	1	1	1	1
NICU	2018-03-16	10:00:00	1	163		4	1	1	1	1	1	1	1	1
NICU	2018-03-16	10:00:00	1	163		1	1	1	1	1	1	1	1	1
NICU	2018-03-16	10:00:00	1	163		4	1	2	1	1	1	1	1	1
NICU	2018-03-16	10:00:00	1	163		1	1	1	1	1	1	1	1	1
NICU	2018-03-02	17:00:00	6	164		3	1	1	2	2	1	0	1	1
NICU	2018-03-02	17:00:00	1	165		4	1	1	1	1	1	1	1	1
NICU	2018-03-08	14:30:00	1	165		3	1	2	1	1	1	1	1	1
NICU	2018-03-02	17:00:00	1	165		3	1	1	2	2	1	0	1	1
NICU	2018-03-02	16:30:00	1	166		3	1	2	1	1	1	1	1	1
NICU	2018-03-02	16:30:00	1	166		3	1	2	2	2	1	0	1	1
NICU	2018-03-16	10:00:00	2	167	NICU	3	1	1	1	1	1	1	1	1
NICU	2018-03-16	10:00:00	2	167	NICU	2	1	1	1	1	1	1	1	1
NICU	2018-03-16	10:00:00	2	167	NICU	3	1	2	1	1	1	1	1	1
NICU	2018-03-16	10:00:00	2	167	NICU	1	1	1	1	1	1	1	1	1
NICU	2018-03-16	10:00:00	2	167	NICU	4	1	1	1	1	1	1	1	1
NICU	2018-03-13	14:50:00	2	168	NICU	4	1	2	1	1	1	1	1	1
NICU	2018-03-02	17:00:00	2	168	NICU	3	1	2	2	2	1	0
NICU	2018-03-13	14:50:00	2	168	NICU	1	1	1	2	2	1	0
NICU	2018-03-08	14:30:00	1	169		2	1	2	1	1	1	1
NICU	2018-03-13	14:50:00	1	169		4	1	1	1	1	1	1
NICU	2018-03-13	14:50:00	1	169		2	1	1	1	1	1	1
NICU	2018-03-13	14:50:00	1	169		4	1	1	2	2	1	0
NICU	2018-03-13	14:50:00	1	170		4	1	1	1	1	1	1
NICU	2018-03-13	14:50:00	1	170		4	1	2	1	1	1	1
NICU	2018-03-13	14:50:00	1	170		2	1	2	1	1	1	1
NICU	2018-03-13	14:50:00	1	170		2	1	1	2	1	1	0
NICU	2018-03-08	14:30:00	1	171		4	1	2	1	1	1	1
NICU	2018-03-13	14:50:00	2	172	NICU	2	1	1	1	1	1	1
NICU	2018-03-02	16:30:00	2	173	NICU	4	1	2	1	1	1	1
NICU	2018-03-08	14:30:00	2	173	NICU	2	1	2	1	1	1	1
NICU	2018-03-16	10:00:00	3	174	RAD	4	1	1	2	2	1	0
NICU	2018-03-02	17:00:00	1	175		2	2				1	0
NICU	2018-03-02	17:00:00	1	176		2	2				1	0
NICU	2018-03-02	17:00:00	3	177	NICU	3	2	3			1	0
NICU	2018-04-18	14:35:00	1	178		5	1	1	2	2	1	0	1	0
NICU	2018-04-05	10:35:00	1	179		3	1	2	1	1	1	1	1	1
NICU	2018-04-05	10:35:00	1	179		1	1	1	1	1	1	1	1	1
NICU	2018-04-05	10:35:00	1	179									1	1
NICU	2018-04-18	14:35:00	1	180									1	1
NICU	2018-04-18	14:35:00	1	180									1	1
NICU	2018-04-24	10:00:00	1	181		3	1	2	1	1	1	1	1	1
NICU	2018-04-24	10:00:00	1	181		1	1	1	1	1	1	1	1	1
NICU	2018-04-24	10:00:00	1	181		3	1	2	1	1	1	1	1	1
NICU	2018-04-24	10:00:00	1	181		4	1	1	1	1	1	1	1	1
NICU	2018-04-24	10:00:00	1	182		2	1	1	1	1	1	1	1	1
NICU	2018-04-24	10:00:00	1	182		1	1	1	1	1	1	1	1	1
NICU	2018-04-24	10:00:00	1	182		4	1	2	1	1	1	1	1	1
NICU	2018-04-24	10:00:00	1	183		3	1	1	1	1	1	1	1	1
NICU	2018-04-24	10:00:00	1	184		3	1	1	1	1	1	1	1	1
NICU	2018-04-24	10:00:00	1	184		1	1	1	1	1	1	1	1	1
NICU	2018-04-24	10:00:00	1	184		4	1	1	1	1	1	1	1	1
NICU	2018-04-24	10:00:00	1	184		3	1	1	1	1	1	1	1	1
NICU	2018-04-24	10:00:00	2	185	NICU	1	1	1	1	1	1	1	1	1
NICU	2018-04-24	10:00:00	2	185	NICU	4	1	1	1	1	1	1	1	1
NICU	2018-04-24	10:00:00	6	186		5	1	1	2	2	1	0	1	1
NICU	2018-04-05	10:35:00	1	187		3	1	2	1	1	1	1	1	1
NICU	2018-04-05	10:35:00	1	187		1	1	1	1	1	1	1	1	1
NICU	2018-04-05	10:35:00	1	187		1	1	1	1	1	1	1	1	1
NICU	2018-04-05	10:35:00	1	187		4	1	1	1	1	1	1	1	1
NICU	2018-04-18	14:35:00	1	187		2	1	1	1	1	1	1	1	1
NICU	2018-04-18	14:35:00	1	187		4	1	1	2	2	1	0	1	1
NICU	2018-04-25	14:30:00	1	188		3	1	2	1	1	1	1	1	1
NICU	2018-04-25	14:30:00	1	188		3	1	1	1	1	1	1	1	1
NICU	2018-04-18	14:35:00	1	188		2	1	1	2	2	1	0	1	1
NICU	2018-04-18	14:35:00	1	189		3	1	1	1	1	1	1	1	1
NICU	2018-04-18	14:35:00	1	189		3	1	1	1	1	1	1	1	1
NICU	2018-04-18	14:35:00	1	189		4	1	2	1	1	1	1	1	1
NICU	2018-04-25	14:30:00	1	190		1	1	1	1	1	1	1	1	1
NICU	2018-04-25	14:30:00	1	190		4	1	1	1	1	1	1	1	1
NICU	2018-04-05	10:35:00	1	191		4	1	2	1	1	1	1	1	1
NICU	2018-04-05	10:35:00	1	191		1	1	1	1	1	1	1	1	1
NICU	2018-04-11	10:30:00	1	192		3	1	1	1	1	1	1	1	1
NICU	2018-04-11	10:30:00	1	192		5	1	1	1	1	1	1	1	1
NICU	2018-04-25	14:30:00	1	192		4	1	1	1	1	1	1	1	1
NICU	2018-04-25	14:30:00	1	192		4	1	1	1	1	1	1	1	1
NICU	2018-04-05	10:35:00	1	193		3	1	2	1	1	1	1	1	1
NICU	2018-04-25	14:30:00	1	194		4	1	1	1	1	1	1	1	1
NICU	2018-04-11	10:30:00	1	195		1	1	1	1	1	1	1	1	1
NICU	2018-04-11	10:30:00	1	195		4	1	1	1	1	1	1	1	1
NICU	2018-04-11	10:30:00	1	195		5	1	1	2	2	1	0
NICU	2018-04-18	14:35:00	1	195		4	1	1	2	2	1	0
NICU	2018-04-18	14:35:00	1	195		1	1	1	2	2	1	0
NICU	2018-04-18	14:35:00	1	195		3	1	1	2	2	1	0
NICU	2018-04-18	14:35:00	1	196		4	1	1	2	2	1	0
NICU	2018-04-05	10:35:00	1	197		4	1	2	1	1	1	1
NICU	2018-04-05	10:35:00	1	197		4	1	1	1	1	1	1
NICU	2018-04-05	10:35:00	1	198		2	1	1	1	1	1	1
NICU	2018-04-05	10:35:00	1	198		3	1	2	1	1	1	1
NICU	2018-04-05	10:35:00	1	198		3	1	2	1	1	1	1
NICU	2018-04-05	10:35:00	1	198		5	1	1	1	1	1	1
NICU	2018-04-11	10:30:00	1	198		5	1	2	1	1	1	1
NICU	2018-04-18	14:35:00	1	199		3	1	1	1	1	1	1
NICU	2018-04-18	14:35:00	1	200		4	1	2	2	2	1	0
NICU	2018-04-18	14:35:00	2	201		2	1	1	1	1	1	1
NICU	2018-04-05	10:35:00	2	202	NICU	3	1	2	1	1	1	1
NICU	2018-04-18	14:35:00	3	203	PD	4	1	1	2	2	1	0
NICU	2018-04-18	14:35:00	3	203	PD	1	1	1	2	2	1	0
NICU	2018-04-18	14:35:00	3	203	PD	3	1	1	2	2	1	0
NICU	2018-04-05	10:35:00	3	204	PD	1	1	1	1	1	1	1
NICU	2018-04-05	10:35:00	3	204	PD	4	1	2	1	1	1	1
NICU	2018-04-05	10:35:00	3	205	URO	1	1	1	2	2	1	0
NICU	2018-04-05	10:35:00	1	206		1	2				1	0
NICU	2018-04-11	10:30:00	1	207		3	2				1	0
NICU	2018-04-05	10:35:00	3	208	URO	3	2				1	0
NICU	2018-04-05	10:35:00	1	209		4	2				1	0
NICU	2018-04-11	10:30:00	1	210		5	2				1	0
NICU	2018-04-05	10:35:00	1	211		5	2				1	0
NICU	2018-04-05	10:35:00	2	212	NICU	5	2				1	0
NICU	2018-04-05	10:35:00	2	212	NICU	5	2				1	0
NICU	2018-05-14	11:30:00	2	213	NICU	5	2				1	0
NICU	2018-05-10	09:30:00	1	214		1	1	1	2	2	1	0	1	1
NICU	2018-05-23	14:00:00	1	215		1	1	1	2	2	1	0
NICU	2018-05-23	14:00:00	1	215		4	1	1	2	2	1	0
NICU	2018-05-14	11:30:00	1	216		5	1	1	2	2	1	0
NICU	2018-05-10	09:30:00	1	216		4	1	1	2	2	1	0
NICU	2018-05-23	14:00:00	1	217		1	1	1	1	2	1	0
NICU	2018-05-23	14:00:00	1	217		4	1	1	1	2	1	0
NICU	2018-05-23	14:00:00	1	217		5	1	1	2	2	1	0
NICU	2018-05-04	15:00:00	1	218		4	1	1	2	2	1	0
NICU	2018-05-03	10:30:00	1	219		4	1	1	2	2	1	0
NICU	2018-05-03	10:30:00	1	219		2	1	1	2	2	1	0
NICU	2018-05-03	10:30:00	1	219		4	1	1	2	2	1	0
NICU	2018-05-03	10:30:00	1	219		2	1	1	2	2	1	0
NICU	2018-05-14	11:30:00	1	220		1	1	1	2	2	1	0
NICU	2018-05-14	11:30:00	1	220		4	1	1	2	2	1	0
NICU	2018-05-16	14:20:00	1	221		2	1	1	2	2	1	0
NICU	2018-05-16	14:20:00	1	221		2	1	1	2	2	1	0
NICU	2018-05-16	14:20:00	1	221		2	1	1	2	2	1	0
NICU	2018-05-03	10:30:00	1	222		3	1	1	2	2	1	0
NICU	2018-05-03	10:30:00	1	222		3	1	1	2	2	1	0
NICU	2018-05-10	09:30:00	1	223		3	1	1	2	2	1	0
NICU	2018-05-10	09:30:00	1	223		4	1	1	2	2	1	0
NICU	2018-05-14	11:30:00	1	224		4	1	1	2	2	1	0
NICU	2018-05-14	11:30:00	1	224		5	1	1	2	2	1	0
NICU	2018-05-16	14:20:00	1	224		2	1	1	2	2	1	0
NICU	2018-05-10	09:30:00	1	225		1	1	1	2	2	1	0
NICU	2018-05-04	15:00:00	1	226		1	1	1	1	1	1	1	1	1
NICU	2018-05-04	15:00:00	1	226		1	1	1	1	1	1	1	1	1
NICU	2018-05-03	10:30:00	1	227		5	1	1	1	1	1	1
NICU	2018-05-03	10:30:00	1	227		5	1	2	1	1	1	1
NICU	2018-05-04	15:00:00	1	227		4	1	1	1	1	1	1
NICU	2018-05-04	15:00:00	1	227		2	1	1	1	1	1	1
NICU	2018-05-04	15:00:00	1	227		3	1	2	1	1	1	1
NICU	2018-05-04	15:00:00	1	227		3	1	1	1	1	1	1
NICU	2018-05-03	10:30:00	1	227		5	1	1	1	1	1	1
NICU	2018-05-03	10:30:00	1	227		5	1	2	1	1	1	1
NICU	2018-05-17	09:50:00	1	227		4	1	1	1	1	1	1
NICU	2018-05-17	09:50:00	1	227		2	1	1	1	1	1	1
NICU	2018-05-17	09:50:00	1	227		4	1	1	1	1	1	1
NICU	2018-05-17	09:50:00	1	227		2	1	1	1	1	1	1
NICU	2018-05-14	11:30:00	1	228		3	1	1	1	1	1	1
NICU	2018-05-14	11:30:00	1	228		1	1	1	1	1	1	1
NICU	2018-05-14	11:30:00	1	228		4	1	1	1	1	1	1
NICU	2018-05-10	09:30:00	1	228		4	1	2	1	1	1	1
NICU	2018-05-04	15:00:00	1	229		3	1	2	1	1	1	1
NICU	2018-05-04	15:00:00	1	229		1	1	1	1	1	1	1
NICU	2018-05-04	15:00:00	1	229		3	1	2	1	1	1	1
NICU	2018-05-17	09:50:00	1	229		2	1	1	1	1	1	1
NICU	2018-05-17	09:50:00	1	229		2	1	1	1	1	1	1
NICU	2018-05-17	09:50:00	1	229		4	1	1	1	1	1	1
NICU	2018-05-03	10:30:00	1	230		2	1	1	1	1	1	1
NICU	2018-05-03	10:30:00	1	230		3	1	1	1	1	1	1
NICU	2018-05-03	10:30:00	1	230		3	1	2	1	1	1	1
NICU	2018-05-03	10:30:00	1	230		2	1	1	1	1	1	1
NICU	2018-05-03	10:30:00	1	230		3	1	1	1	1	1	1
NICU	2018-05-03	10:30:00	1	230		3	1	2	1	1	1	1
NICU	2018-05-14	11:30:00	1	231		2	1	1	1	1	1	1
NICU	2018-05-03	10:30:00	1	231		4	1	2	1	1	1	1
NICU	2018-05-03	10:30:00	1	231		1	1	1	1	1	1	1
NICU	2018-05-03	10:30:00	1	231		4	1	1	1	1	1	1
NICU	2018-05-03	10:30:00	1	231		4	1	1	1	1	1	1
NICU	2018-05-04	15:00:00	1	231		1	1	1	1	1	1	1
NICU	2018-05-04	15:00:00	1	231		4	1	1	1	1	1	1
NICU	2018-05-04	15:00:00	1	231		4	1	1	1	1	1	1
NICU	2018-05-04	15:00:00	1	231		1	1	1	1	1	1	1
NICU	2018-05-04	15:00:00	1	231		3	1	1	1	1	1	1
NICU	2018-05-04	15:00:00	1	231		2	1	1	1	1	1	1
NICU	2018-05-03	10:30:00	1	231		4	1	2	1	1	1	1
NICU	2018-05-03	10:30:00	1	231		1	1	1	1	1	1	1
NICU	2018-05-03	10:30:00	1	231		4	1	1	1	1	1	1
NICU	2018-05-03	10:30:00	1	231		4	1	1	1	1	1	1
NICU	2018-05-04	15:00:00	1	232		1	1	1	1	1	1	1
NICU	2018-05-04	15:00:00	1	232		4	1	1	1	1	1	1
NICU	2018-05-04	15:00:00	1	232		1	1	1	1	1	1	1
NICU	2018-05-04	15:00:00	1	233		1	1	1	1	1	1	1
NICU	2018-05-04	15:00:00	1	233		3	1	1	1	1	1	1
NICU	2018-05-04	15:00:00	1	233		4	1	1	1	1	1	1
NICU	2018-05-04	15:00:00	1	233		3	1	1	1	1	1	1
NICU	2018-05-23	14:00:00	1	233		3	1	1	1	1	1	1
NICU	2018-05-23	14:00:00	1	233		1	1	1	1	1	1	1
NICU	2018-05-23	14:00:00	1	233		2	1	1	1	1	1	1
NICU	2018-05-23	14:00:00	1	233		3	1	1	1	1	1	1
NICU	2018-05-17	09:50:00	1	233		4	1	1	1	1	1	1
NICU	2018-05-17	09:50:00	1	233		1	1	1	1	1	1	1
NICU	2018-05-17	09:50:00	1	234		4	1	1	1	1	1	1
NICU	2018-05-17	09:50:00	1	234		5	1	1	1	1	1	1
NICU	2018-05-03	10:30:00	1	235		5	1	2	1	1	1	1
NICU	2018-05-23	14:00:00	1	235		1	1	1	1	1	1	1
NICU	2018-05-23	14:00:00	1	235		1	1	1	1	1	1	1
NICU	2018-05-23	14:00:00	1	235		4	1	2	1	1	1	1
NICU	2018-05-03	10:30:00	1	235		5	1	2	1	1	1	1
NICU	2018-05-16	14:20:00	1	236		2	1	1	1	1	1	1
NICU	2018-05-16	14:20:00	1	236		2	1	1	1	1	1	1
NICU	2018-05-10	09:30:00	1	237		1	1	2	1	1	1	1
NICU	2018-05-14	11:30:00	1	238		1	1	1	1	1	1	1
NICU	2018-05-14	11:30:00	1	238		2	1	1	1	1	1	1
NICU	2018-05-16	14:20:00	1	238		2	1	1	1	1	1	1
NICU	2018-05-14	11:30:00	1	239		1	1	1	1	1	1	1
NICU	2018-05-14	11:30:00	1	239		5	1	1	1	1	1	1
NICU	2018-05-10	09:30:00	1	239		1	1	1	1	1	1	1
NICU	2018-05-10	09:30:00	1	239		4	1	1	1	1	1	1
NICU	2018-05-10	09:30:00	1	239		4	1	2	1	1	1	1
NICU	2018-05-10	09:30:00	1	239		5	1	1	1	1	1	1
NICU	2018-05-10	09:30:00	1	239		1	1	1	1	1	1	1
NICU	2018-05-10	09:30:00	1	239		3	1	1	1	1	1	1
NICU	2018-05-14	11:30:00	1	240		2	1	1	1	1	1	1
NICU	2018-05-14	11:30:00	1	240		3	1	1	1	1	1	1
NICU	2018-05-10	09:30:00	1	241		4	1	2	1	1	1	1
NICU	2018-05-10	09:30:00	1	241		4	1	1	1	1	1	1
NICU	2018-05-14	11:30:00	1	242		2	1	1	1	1	1	1
NICU	2018-05-14	11:30:00	2	243	NICU	1	1	1	1	1	1	1
NICU	2018-05-14	11:30:00	2	243	NICU	4	1	1	1	1	1	1
NICU	2018-05-14	11:30:00	2	243	NICU	5	1	2	1	1	1	1
NICU	2018-05-14	11:30:00	2	244	NICU	1	1	1	1	1	1	1
NICU	2018-05-14	11:30:00	2	244	NICU	4	1	1	1	1	1	1
NICU	2018-05-14	11:30:00	2	244	NICU	2	1	1	1	1	1	1
NICU	2018-06-05	14:30:00	1	245		4	1	1	1	1	1	1
NICU	2018-06-05	14:30:00	1	246		4	1	1	1	1	1	1
NICU	2018-06-05	14:30:00	1	247		5	1	1	1	1	1	1
NICU	2018-06-12	14:30:00	1	248		3	1	2	1	1	1	1
NICU	2018-06-12	14:30:00	1	248		1	1	1	1	1	1	1
NICU	2018-06-12	14:30:00	1	248		4	1	1	1	1	1	1
NICU	2018-06-12	14:30:00	1	248		4	1	1	1	1	1	1
NICU	2018-06-12	14:30:00	1	249		1	1	1	1	1	1	1
NICU	2018-06-12	14:30:00	1	250		4	1	1	1	1	1	1
NICU	2018-06-14	15:00:00	1	251		2	1	1	1	1	1	1
NICU	2018-06-14	15:00:00	1	251		3	1	1	1	1	1	1
NICU	2018-06-14	15:00:00	2	252	NICU	1	1	1	2	2	1	0
NICU	2018-06-22	11:20:00	2	252		2	1	1	2	2	1	0
NICU	2018-06-22	11:20:00	2	252	PD	5	1	1	2	2	1	0

## Sheet: environmental culture etc.
Ward	Name	Test	Specimen ID	Date of Reception	접수시간	Date of Report	결과시간	Result
NICU	40	Culture & ID (Infection Control)	201711284000660	2017-11-28	13:20	2017-12-01	14:34	No growth bacteria
NICU	7	Culture & ID (Infection Control)	201711284000790	2017-11-28	13:21	2017-11-30	16:07	Klebsiella pneumoniae : Growth
NICU	42	Culture & ID (Infection Control)	201711284000680	2017-11-28	13:21	2017-11-30	16:07	Klebsiella pneumoniae : Growth
NICU	2 (Environment)	Culture & ID (Infection Control)	201801054001010	2018-01-05	16:33	2018-01-08	14:42	Klebsiella pneumoniae : Growth
NICU	10	Culture & ID (Infection Control)	201712204000410	2017-12-21	10:16	2017-12-27	14:47	Klebsiella pneumoniae: Growth
NICU	42	Culture & ID (Infection Control)	201712204002060	2017-12-21	10:16	2017-12-27	14:47	Klebsiella pneumoniae: Growth
NICU	43	Culture & ID (Infection Control)	201712204000740	2017-12-21	10:13	2017-12-27	14:47	Klebsiella pneumoniae: Growth
NICU	2 (Healcare worker)	Culture & ID (Infection Control)	201712204001610	2017-12-22	16:46	2017-12-28	11:20	No growth bacteria
NICU	33 (Healcare worker)	Culture & ID (Infection Control)	201712204001650	2017-12-22	16:44	2017-12-28	11:20	Klebsiella pneumoniae: Growth
NICU	39 (Healcare worker)	Culture & ID (Infection Control)	201712204001710	2017-12-26	16:19	2017-12-28	15:14	No growth bacteria
NICU	40 (Healcare worker)	Culture & ID (Infection Control)	201712204001730	2017-12-26	16:19	2017-12-28	15:14	No growth bacteria
NICU	1	Culture & ID (Infection Control)	201711284000420	2017-11-28	13:14	2017-11-30	13:35	No growth bacteria
NICU	2	Culture & ID (Infection Control)	201711284000530	2017-11-28	13:23	2017-11-30	13:38	No growth bacteria
NICU	3	Culture & ID (Infection Control)	201711284000540	2017-11-28	13:26	2017-11-30	13:41	No growth bacteria
NICU	4	Culture & ID (Infection Control)	201711284000650	2017-11-28	13:20	2017-11-30	13:35	No growth bacteria
NICU	5	Culture & ID (Infection Control)	201711284000760	2017-11-28	13:21	2017-11-30	13:37	No growth bacteria
NICU	6	Culture & ID (Infection Control)	201711284000780	2017-11-28	13:20	2017-11-30	13:36	No growth bacteria
NICU	8	Culture & ID (Infection Control)	201711284000800	2017-11-28	13:25	2017-11-30	13:40	No growth bacteria
NICU	9	Culture & ID (Infection Control)	201711284000810	2017-11-28	13:26	2017-11-30	13:41	No growth bacteria
NICU	10	Culture & ID (Infection Control)	201711284000320	2017-11-28	13:23	2017-11-30	13:38	No growth bacteria
NICU	11	Culture & ID (Infection Control)	201711284000330	2017-11-28	13:24	2017-11-30	13:39	No growth bacteria
NICU	12	Culture & ID (Infection Control)	201711284000340	2017-11-28	13:25	2017-11-30	13:41	No growth bacteria
NICU	13	Culture & ID (Infection Control)	201711284000350	2017-11-28	13:24	2017-11-30	13:40	No growth bacteria
NICU	14	Culture & ID (Infection Control)	201711284000360	2017-11-28	13:23	2017-11-30	13:38	No growth bacteria
NICU	15	Culture & ID (Infection Control)	201711284000370	2017-11-28	13:26	2017-11-30	13:42	No growth bacteria
NICU	16	Culture & ID (Infection Control)	201711284000380	2017-11-28	13:21	2017-11-30	13:36	No growth bacteria
NICU	17	Culture & ID (Infection Control)	201711284000390	2017-11-28	13:21	2017-11-30	13:37	No growth bacteria
NICU	18	Culture & ID (Infection Control)	201711284000400	2017-11-28	13:25	2017-11-30	13:41	No growth bacteria
NICU	19	Culture & ID (Infection Control)	201711284000410	2017-11-28	13:26	2017-11-30	13:41	No growth bacteria
NICU	20	Culture & ID (Infection Control)	201711284000430	2017-11-28	13:23	2017-11-30	13:37	No growth bacteria
NICU	21	Culture & ID (Infection Control)	201711284000440	2017-11-28	13:24	2017-11-30	13:39	No growth bacteria
NICU	22	Culture & ID (Infection Control)	201711284000450	2017-11-28	13:20	2017-11-30	13:35	No growth bacteria
NICU	23	Culture & ID (Infection Control)	201711284000460	2017-11-28	13:23	2017-11-30	13:38	No growth bacteria
NICU	24	Culture & ID (Infection Control)	201711284000470	2017-11-28	13:25	2017-11-30	13:41	No growth bacteria
NICU	25	Culture & ID (Infection Control)	201711284000480	2017-11-28	13:21	2017-11-30	13:36	No growth bacteria
NICU	26	Culture & ID (Infection Control)	201711284000490	2017-11-28	13:20	2017-11-30	13:36	No growth bacteria
NICU	27	Culture & ID (Infection Control)	201711284000500	2017-11-28	13:24	2017-11-30	13:40	No growth bacteria
NICU	28	Culture & ID (Infection Control)	201711284000510	2017-11-28	13:24	2017-11-30	13:40	No growth bacteria
NICU	29	Culture & ID (Infection Control)	201711284000520	2017-11-28	13:20	2017-11-30	13:35	No growth bacteria
NICU	30	Culture & ID (Infection Control)	201711284000550	2017-11-28	13:23	2017-11-30	13:38	No growth bacteria
NICU	31	Culture & ID (Infection Control)	201711284000560	2017-11-28	13:21	2017-11-30	13:36	No growth bacteria
NICU	32	Culture & ID (Infection Control)	201711284000570	2017-11-28	13:26	2017-11-30	13:42	No growth bacteria
NICU	33	Culture & ID (Infection Control)	201711284000580	2017-11-28	13:25	2017-11-30	13:41	No growth bacteria
NICU	34	Culture & ID (Infection Control)	201711284000590	2017-11-28	13:20	2017-11-30	13:35	No growth bacteria
NICU	35	Culture & ID (Infection Control)	201711284000600	2017-11-28	13:20	2017-11-30	13:35	No growth bacteria
NICU	36	Culture & ID (Infection Control)	201711284000610	2017-11-28	13:20	2017-11-30	13:35	No growth bacteria
NICU	37	Culture & ID (Infection Control)	201711284000620	2017-11-28	13:23	2017-11-30	13:37	No growth bacteria
NICU	38	Culture & ID (Infection Control)	201711284000630	2017-11-28	13:24	2017-11-30	13:40	No growth bacteria
NICU	39	Culture & ID (Infection Control)	201711284000640	2017-11-28	13:21	2017-11-30	13:37	No growth bacteria
NICU	41	Culture & ID (Infection Control)	201711284000670	2017-11-28	13:25	2017-11-30	13:40	No growth bacteria
NICU	43	Culture & ID (Infection Control)	201711284000690	2017-11-28	13:23	2017-11-30	13:37	No growth bacteria
NICU	44	Culture & ID (Infection Control)	201711284000700	2017-11-28	13:23	2017-11-30	13:38	No growth bacteria
NICU	45	Culture & ID (Infection Control)	201711284000710	2017-11-28	13:21	2017-11-30	13:36	No growth bacteria
NICU	46	Culture & ID (Infection Control)	201711284000720	2017-11-28	13:25	2017-11-30	13:41	No growth bacteria
NICU	47	Culture & ID (Infection Control)	201711284000730	2017-11-28	13:21	2017-11-30	13:36	No growth bacteria
NICU	48	Culture & ID (Infection Control)	201711284000740	2017-11-28	13:23	2017-11-30	13:37	No growth bacteria
NICU	49	Culture & ID (Infection Control)	201711284000750	2017-11-28	13:26	2017-11-30	13:42	No growth bacteria
NICU	50	Culture & ID (Infection Control)	201711284000770	2017-11-28	13:25	2017-11-30	13:40	No growth bacteria
NICU	1 (Environment)	Culture & ID (Infection Control)	201712074000340	2017-12-07	10:51	2017-12-09	16:42	No growth bacteria
NICU	2 (Environment)	Culture & ID (Infection Control)	201712074000360	2017-12-07	10:51	2017-12-11	09:14	No growth bacteria
NICU	3 (Environment)	Culture & ID (Infection Control)	201712074000370	2017-12-07	10:51	2017-12-11	09:14	No growth bacteria
NICU	4 (Environment)	Culture & ID (Infection Control)	201712074000380	2017-12-07	10:51	2017-12-11	09:14	No growth bacteria
NICU	5 (Environment)	Culture & ID (Infection Control)	201712074000390	2017-12-07	10:51	2017-12-11	09:14	No growth bacteria
NICU	6 (Environment)	Culture & ID (Infection Control)	201712074000400	2017-12-07	10:51	2017-12-09	16:42	No growth bacteria
NICU	7 (Environment)	Culture & ID (Infection Control)	201712074000410	2017-12-07	10:51	2017-12-11	09:14	No growth bacteria
NICU	8 (Environment)	Culture & ID (Infection Control)	201712074000420	2017-12-07	10:51	2017-12-11	09:15	No growth bacteria
NICU	9 (Environment)	Culture & ID (Infection Control)	201712074000430	2017-12-07	10:51	2017-12-11	09:14	No growth bacteria
NICU	10 (Environment)	Culture & ID (Infection Control)	201712074000350	2017-12-07	10:51	2017-12-11	09:14	No growth bacteria
NICU	1	Culture & ID (Infection Control)	201712204000370	2017-12-21	10:10	2017-12-22	15:41	No growth bacteria
NICU	2	Culture & ID (Infection Control)	201712204000520	2017-12-21	10:10	2017-12-22	15:40	No growth bacteria
NICU	3	Culture & ID (Infection Control)	201712204000630	2017-12-21	10:13	2017-12-22	15:42	No growth bacteria
NICU	4	Culture & ID (Infection Control)	201712204000650	2017-12-21	10:19	2017-12-22	15:44	No growth bacteria
NICU	5	Culture & ID (Infection Control)	201712204000850	2017-12-21	10:13	2017-12-22	15:42	No growth bacteria
NICU	6	Culture & ID (Infection Control)	201712204000860	2017-12-21	10:20	2017-12-22	15:45	No growth bacteria
NICU	7	Culture & ID (Infection Control)	201712204001070	2017-12-21	10:20	2017-12-22	15:45	No growth bacteria
NICU	8	Culture & ID (Infection Control)	201712204001180	2017-12-21	10:13	2017-12-22	15:41	No growth bacteria
NICU	9	Culture & ID (Infection Control)	201712204001290	2017-12-21	10:13	2017-12-22	15:47	No growth bacteria
NICU	11	Culture & ID (Infection Control)	201712204000430	2017-12-21	10:14	2017-12-22	15:46	No growth bacteria
NICU	12	Culture & ID (Infection Control)	201712204000440	2017-12-21	10:16	2017-12-22	15:44	No growth bacteria
NICU	13	Culture & ID (Infection Control)	201712204000450	2017-12-21	10:13	2017-12-26	12:32	No growth bacteria
NICU	14	Culture & ID (Infection Control)	201712204000460	2017-12-21	10:14	2017-12-22	15:47	No growth bacteria
NICU	15	Culture & ID (Infection Control)	201712204000470	2017-12-21	10:10	2017-12-22	15:40	No growth bacteria
NICU	16	Culture & ID (Infection Control)	201712204000480	2017-12-21	10:10	2017-12-22	15:41	No growth bacteria
NICU	17	Culture & ID (Infection Control)	201712204000490	2017-12-21	10:20	2017-12-22	15:45	No growth bacteria
NICU	18	Culture & ID (Infection Control)	201712204000500	2017-12-21	10:20	2017-12-22	15:46	No growth bacteria
NICU	19	Culture & ID (Infection Control)	201712204000510	2017-12-21	10:13	2017-12-22	15:42	No growth bacteria
NICU	20	Culture & ID (Infection Control)	201712204000530	2017-12-21	10:17	2017-12-22	15:44	No growth bacteria
NICU	21	Culture & ID (Infection Control)	201712204000540	2017-12-21	10:17	2017-12-22	15:47	No growth bacteria
NICU	22	Culture & ID (Infection Control)	201712204000550	2017-12-21	10:13	2017-12-22	15:47	No growth bacteria
NICU	23	Culture & ID (Infection Control)	201712204000560	2017-12-21	10:09	2017-12-22	15:38	No growth bacteria
NICU	24	Culture & ID (Infection Control)	201712204000570	2017-12-21	10:13	2017-12-22	15:42	No growth bacteria
NICU	25	Culture & ID (Infection Control)	201712204000580	2017-12-21	10:10	2017-12-22	15:41	No growth bacteria
NICU	26	Culture & ID (Infection Control)	201712204000590	2017-12-21	10:11	2017-12-22	15:41	No growth bacteria
NICU	27	Culture & ID (Infection Control)	201712204000600	2017-12-21	10:16	2017-12-22	15:43	No growth bacteria
NICU	28	Culture & ID (Infection Control)	201712204000610	2017-12-21	10:13	2017-12-22	15:42	No growth bacteria
NICU	29	Culture & ID (Infection Control)	201712204000620	2017-12-21	10:16	2017-12-22	15:43	No growth bacteria
NICU	30	Culture & ID (Infection Control)	201712204000660	2017-12-21	10:10	2017-12-22	15:40	No growth bacteria
NICU	31	Culture & ID (Infection Control)	201712204000680	2017-12-21	10:16	2017-12-22	15:43	No growth bacteria
NICU	32	Culture & ID (Infection Control)	201712204000670	2017-12-21	10:13	2017-12-22	15:41	No growth bacteria
NICU	33	Culture & ID (Infection Control)	201712204000710	2017-12-21	10:08	2017-12-22	15:34	No growth bacteria
NICU	34	Culture & ID (Infection Control)	201712204000690	2017-12-21	10:20	2017-12-22	15:45	No growth bacteria
NICU	35	Culture & ID (Infection Control)	201712204000640	2017-12-21	10:16	2017-12-22	15:43	No growth bacteria
NICU	36	Culture & ID (Infection Control)	201712204000700	2017-12-21	10:17	2017-12-22	15:47	No growth bacteria
NICU	37	Culture & ID (Infection Control)	201712204000720	2017-12-21	10:13	2017-12-22	15:46	No growth bacteria
NICU	38	Culture & ID (Infection Control)	201712204000730	2017-12-21	10:20	2017-12-22	15:45	No growth bacteria
NICU	39	Culture & ID (Infection Control)	201712204000750	2017-12-21	10:17	2017-12-22	15:44	No growth bacteria
NICU	40	Culture & ID (Infection Control)	201712204000760	2017-12-21	10:10	2017-12-22	15:41	No growth bacteria
NICU	41	Culture & ID (Infection Control)	201712204000770	2017-12-21	10:17	2017-12-26	12:33	No growth bacteria
NICU	44	Culture & ID (Infection Control)	201712204000780	2017-12-21	10:09	2017-12-22	15:34	No growth bacteria
NICU	45	Culture & ID (Infection Control)	201712204000790	2017-12-21	10:14	2017-12-22	15:47	No growth bacteria
NICU	46	Culture & ID (Infection Control)	201712204000800	2017-12-21	10:20	2017-12-22	15:45	No growth bacteria
NICU	47	Culture & ID (Infection Control)	201712204000820	2017-12-21	10:17	2017-12-22	15:47	No growth bacteria
NICU	48	Culture & ID (Infection Control)	201712204000830	2017-12-21	10:09	2017-12-22	15:38	No growth bacteria
NICU	49	Culture & ID (Infection Control)	201712204000810	2017-12-21	10:12	2017-12-22	15:41	No growth bacteria
NICU	50	Culture & ID (Infection Control)	201712204000870	2017-12-21	10:16	2017-12-22	15:43	No growth bacteria
NICU	1 (Healcare worker)	Culture & ID (Infection Control)	201712204001500	2017-12-22	16:47	2017-12-26	12:40	No growth bacteria
NICU	3 (Healcare worker)	Culture & ID (Infection Control)	201712204001720	2017-12-22	16:46	2017-12-26	14:55	No growth bacteria
NICU	4 (Healcare worker)	Culture & ID (Infection Control)	201712204001760	2017-12-22	16:44	2017-12-26	12:37	No growth bacteria
NICU	5 (Healcare worker)	Culture & ID (Infection Control)	201712204001770	2017-12-22	16:39	2017-12-26	12:35	No growth bacteria
NICU	6 (Healcare worker)	Culture & ID (Infection Control)	201712204001780	2017-12-22	16:44	2017-12-26	12:37	No growth bacteria
NICU	7 (Healcare worker)	Culture & ID (Infection Control)	201712204001790	2017-12-22	16:39	2017-12-26	12:36	No growth bacteria
NICU	8 (Healcare worker)	Culture & ID (Infection Control)	201712204001800	2017-12-22	16:47	2017-12-26	12:40	No growth bacteria
NICU	9 (Healcare worker)	Culture & ID (Infection Control)	201712204001810	2017-12-26	16:19	2017-12-27	09:13	No growth bacteria
NICU	10 (Healcare worker)	Culture & ID (Infection Control)	201712204001400	2017-12-26	16:19	2017-12-27	09:15	No growth bacteria
NICU	11 (Healcare worker)	Culture & ID (Infection Control)	201712204001410	2017-12-22	16:47	2017-12-26	14:57	No growth bacteria
NICU	12 (Healcare worker)	Culture & ID (Infection Control)	201712204001420	2017-12-26	16:19	2017-12-27	09:15	No growth bacteria
NICU	13 (Healcare worker)	Culture & ID (Infection Control)	201712204001430	2017-12-22	16:47	2017-12-26	14:57	No growth bacteria
NICU	14 (Healcare worker)	Culture & ID (Infection Control)	201712204001440	2017-12-22	16:39	2017-12-26	12:35	No growth bacteria
NICU	15 (Healcare worker)	Culture & ID (Infection Control)	201712204001450	2017-12-22	16:39	2017-12-26	12:36	No growth bacteria
NICU	16 (Healcare worker)	Culture & ID (Infection Control)	201712204001460	2017-12-22	16:39	2017-12-26	12:36	No growth bacteria
NICU	17 (Healcare worker)	Culture & ID (Infection Control)	201712204001470	2017-12-22	16:44	2017-12-26	12:36	No growth bacteria
NICU	18 (Healcare worker)	Culture & ID (Infection Control)	201712204001480	2017-12-22	16:44	2017-12-26	12:36	No growth bacteria
NICU	19 (Healcare worker)	Culture & ID (Infection Control)	201712204001490	2017-12-22	16:44	2017-12-26	12:36	No growth bacteria
NICU	20 (Healcare worker)	Culture & ID (Infection Control)	201712204001510	2017-12-21	14:10	2017-12-22	15:46	No growth bacteria
NICU	21 (Healcare worker)	Culture & ID (Infection Control)	201712204001520	2017-12-21	14:10	2017-12-27	14:34	No growth bacteria
NICU	22 (Healcare worker)	Culture & ID (Infection Control)	201712204001530	2017-12-22	16:46	2017-12-26	12:39	No growth bacteria
NICU	23 (Healcare worker)	Culture & ID (Infection Control)	201712204001540	2017-12-22	16:47	2017-12-27	17:53	No growth bacteria
NICU	24 (Healcare worker)	Culture & ID (Infection Control)	201712204001550	2017-12-22	16:46	2017-12-26	12:38	No growth bacteria
NICU	25 (Healcare worker)	Culture & ID (Infection Control)	201712204001560	2017-12-22	16:46	2017-12-26	14:57	No growth bacteria
NICU	26 (Healcare worker)	Culture & ID (Infection Control)	201712204001570	2017-12-22	16:46	2017-12-26	12:38	No growth bacteria
NICU	27 (Healcare worker)	Culture & ID (Infection Control)	201712204001580	2017-12-22	16:46	2017-12-26	12:38	No growth bacteria
NICU	28 (Healcare worker)	Culture & ID (Infection Control)	201712204001590	2017-12-22	16:46	2017-12-26	12:38	No growth bacteria
NICU	29 (Healcare worker)	Culture & ID (Infection Control)	201712204001600	2017-12-22	16:44	2017-12-26	12:37	No growth bacteria
NICU	30 (Healcare worker)	Culture & ID (Infection Control)	201712204001620	2017-12-22	16:44	2017-12-26	12:37	No growth bacteria
NICU	31 (Healcare worker)	Culture & ID (Infection Control)	201712204001630	2017-12-22	16:46	2017-12-26	14:55	No growth bacteria
NICU	32 (Healcare worker)	Culture & ID (Infection Control)	201712204001640	2017-12-22	16:44	2017-12-26	14:55	No growth bacteria
NICU	34 (Healcare worker)	Culture & ID (Infection Control)	201712204001660	2017-12-22	16:46	2017-12-26	12:38	No growth bacteria
NICU	35 (Healcare worker)	Culture & ID (Infection Control)	201712204001670	2017-12-22	16:44	2017-12-26	12:37	No growth bacteria
NICU	36 (Healcare worker)	Culture & ID (Infection Control)	201712204001680	2017-12-26	16:19	2017-12-27	09:14	No growth bacteria
NICU	37 (Healcare worker)	Culture & ID (Infection Control)	201712204001690	2017-12-26	16:19	2017-12-27	09:14	No growth bacteria
NICU	38 (Healcare worker)	Culture & ID (Infection Control)	201712204001700	2017-12-26	16:19	2017-12-27	09:16	No growth bacteria
NICU	51	Culture & ID (Infection Control)	201712204000880	2017-12-21	10:20	2017-12-22	15:46	No growth bacteria
NICU	52	Culture & ID (Infection Control)	201712204000900	2017-12-21	10:10	2017-12-22	15:39	No growth bacteria
NICU	53	Culture & ID (Infection Control)	201712204000910	2017-12-21	10:19	2017-12-22	15:44	No growth bacteria
NICU	54	Culture & ID (Infection Control)	201712204000920	2017-12-21	10:16	2017-12-22	15:44	No growth bacteria
NICU	55	Culture & ID (Infection Control)	201712204000930	2017-12-21	10:20	2017-12-22	15:45	No growth bacteria
NICU	56	Culture & ID (Infection Control)	201712204000890	2017-12-21	10:13	2017-12-22	15:42	No growth bacteria
NICU	57	Culture & ID (Infection Control)	201712204000950	2017-12-21	10:16	2017-12-22	15:44	No growth bacteria
NICU	58	Culture & ID (Infection Control)	201712204000960	2017-12-21	10:13	2017-12-22	15:47	No growth bacteria
NICU	59	Culture & ID (Infection Control)	201712204000840	2017-12-21	10:10	2017-12-22	15:39	No growth bacteria
NICU	60	Culture & ID (Infection Control)	201712204000940	2017-12-21	10:17	2017-12-22	15:44	No growth bacteria
NICU	61	Culture & ID (Infection Control)	201712204000970	2017-12-21	10:16	2017-12-22	15:43	No growth bacteria
NICU	62	Culture & ID (Infection Control)	201712204000990	2017-12-21	10:17	2017-12-22	15:47	No growth bacteria
NICU	63	Culture & ID (Infection Control)	201712204001010	2017-12-21	10:09	2017-12-22	15:34	No growth bacteria
NICU	64	Culture & ID (Infection Control)	201712204001020	2017-12-21	10:17	2017-12-22	15:47	No growth bacteria
NICU	65	Culture & ID (Infection Control)	201712204001040	2017-12-21	10:09	2017-12-22	15:34	No growth bacteria
NICU	66	Culture & ID (Infection Control)	201712204000980	2017-12-21	10:10	2017-12-22	15:39	No growth bacteria
NICU	67	Culture & ID (Infection Control)	201712204001050	2017-12-21	10:13	2017-12-22	15:41	No growth bacteria
NICU	68	Culture & ID (Infection Control)	201712204001060	2017-12-21	10:17	2017-12-22	15:48	No growth bacteria
NICU	69	Culture & ID (Infection Control)	201712204001030	2017-12-21	10:13	2017-12-22	15:42	No growth bacteria
NICU	70	Culture & ID (Infection Control)	201712204001080	2017-12-21	10:16	2017-12-22	15:44	No growth bacteria
NICU	71	Culture & ID (Infection Control)	201712204001090	2017-12-21	10:17	2017-12-22	15:47	No growth bacteria
NICU	72	Culture & ID (Infection Control)	201712204001100	2017-12-21	10:10	2017-12-22	15:39	No growth bacteria
NICU	73	Culture & ID (Infection Control)	201712204001110	2017-12-21	10:13	2017-12-22	15:47	No growth bacteria
NICU	74	Culture & ID (Infection Control)	201712204001120	2017-12-21	10:20	2017-12-22	15:45	No growth bacteria
NICU	75	Culture & ID (Infection Control)	201712204001130	2017-12-21	10:13	2017-12-22	15:42	No growth bacteria
NICU	76	Culture & ID (Infection Control)	201712204001140	2017-12-21	10:14	2017-12-22	15:46	No growth bacteria
NICU	77	Culture & ID (Infection Control)	201712204001150	2017-12-21	10:20	2017-12-22	15:48	No growth bacteria
NICU	79	Culture & ID (Infection Control)	201712204001170	2017-12-21	10:13	2017-12-22	15:42	No growth bacteria
NICU	80	Culture & ID (Infection Control)	201712204001190	2017-12-21	10:19	2017-12-22	15:45	No growth bacteria
NICU	81	Culture & ID (Infection Control)	201712204001200	2017-12-21	10:20	2017-12-22	15:46	No growth bacteria
NICU	82	Culture & ID (Infection Control)	201712204001210	2017-12-21	10:13	2017-12-22	15:42	No growth bacteria
NICU	83	Culture & ID (Infection Control)	201712204001220	2017-12-21	10:09	2017-12-22	15:39	No growth bacteria
NICU	84	Culture & ID (Infection Control)	201712204001230	2017-12-21	10:10	2017-12-22	15:40	No growth bacteria
NICU	85	Culture & ID (Infection Control)	201712204001240	2017-12-21	10:20	2017-12-22	15:48	No growth bacteria
NICU	86	Culture & ID (Infection Control)	201712204001250	2017-12-21	10:13	2017-12-22	15:46	No growth bacteria
NICU	87	Culture & ID (Infection Control)	201712204001260	2017-12-21	10:13	2017-12-22	15:41	No growth bacteria
NICU	88	Culture & ID (Infection Control)	201712204001270	2017-12-21	10:16	2017-12-22	15:43	No growth bacteria
NICU	89	Culture & ID (Infection Control)	201712204001280	2017-12-21	10:10	2017-12-22	15:40	No growth bacteria
NICU	90	Culture & ID (Infection Control)	201712204001300	2017-12-21	10:17	2017-12-26	12:33	No growth bacteria
NICU	91	Culture & ID (Infection Control)	201712204001310	2017-12-21	10:13	2017-12-22	15:42	No growth bacteria
NICU	92	Culture & ID (Infection Control)	201712204001320	2017-12-21	10:10	2017-12-22	15:39	No growth bacteria
NICU	93	Culture & ID (Infection Control)	201712204001330	2017-12-21	10:19	2017-12-22	15:45	No growth bacteria
NICU	94	Culture & ID (Infection Control)	201712204001340	2017-12-21	10:17	2017-12-22	15:44	No growth bacteria
NICU	95	Culture & ID (Infection Control)	201712204001350	2017-12-21	10:19	2017-12-22	15:45	No growth bacteria
NICU	96	Culture & ID (Infection Control)	201712204001360	2017-12-21	10:09	2017-12-22	15:34	No growth bacteria
NICU	97	Culture & ID (Infection Control)	201712204001370	2017-12-21	10:13	2017-12-22	15:43	No growth bacteria
NICU	98	Culture & ID (Infection Control)	201712204001380	2017-12-21	10:19	2017-12-22	15:45	No growth bacteria
NICU	99	Culture & ID (Infection Control)	201712204001390	2017-12-21	10:17	2017-12-26	09:47	No growth bacteria
NICU	100	Culture & ID (Infection Control)	201712204000420	2017-12-21	10:16	2017-12-22	15:43	No growth bacteria
NICU	101	Culture & ID (Infection Control)	201712204001960	2017-12-21	10:10	2017-12-22	15:40	No growth bacteria
NICU	102	Culture & ID (Infection Control)	201712204001970	2017-12-21	10:10	2017-12-22	15:40	No growth bacteria
NICU	103	Culture & ID (Infection Control)	201712204002070	2017-12-21	10:19	2017-12-22	15:45	No growth bacteria
NICU	104	Culture & ID (Infection Control)	201712204001980	2017-12-21	10:16	2017-12-22	15:43	No growth bacteria
NICU	105	Culture & ID (Infection Control)	201712204001990	2017-12-21	10:10	2017-12-22	15:40	No growth bacteria
NICU	106	Culture & ID (Infection Control)	201712204002000	2017-12-21	10:10	2017-12-22	15:40	No growth bacteria
NICU	107	Culture & ID (Infection Control)	201712204002010	2017-12-21	10:10	2017-12-22	15:40	No growth bacteria
NICU	108	Culture & ID (Infection Control)	201712204002020	2017-12-21	10:16	2017-12-22	15:43	No growth bacteria
NICU	109	Culture & ID (Infection Control)	201712204002030	2017-12-21	10:20	2017-12-22	15:45	No growth bacteria
NICU	110	Culture & ID (Infection Control)	201712204002040	2017-12-21	10:10	2017-12-22	15:40	No growth bacteria
NICU	111	Culture & ID (Infection Control)	201712204002050	2017-12-21	10:10	2017-12-22	15:40	No growth bacteria
NICU	41 (Healcare worker)	Culture & ID (Infection Control)	201712264000590	2017-12-26	16:19	2017-12-28	09:35	No growth bacteria
NICU	78	Culture & ID (Infection Control)	201712284000300	2017-12-28	15:12	2017-12-29	09:00	No growth bacteria
NICU	1 (Environment)	Culture & ID (Infection Control)	201801054001020	2018-01-05	16:33	2018-01-08	09:15	No growth bacteria
NICU	3 (Environment)	Culture & ID (Infection Control)	201801054001030	2018-01-05	16:34	2018-01-08	09:16	No growth bacteria
NICU	4 (Environment)	Culture & ID (Infection Control)	201801054001040	2018-01-05	16:34	2018-01-08	09:16	No growth bacteria
NICU	5 (Environment)	Culture & ID (Infection Control)	201801054001050	2018-01-05	16:33	2018-01-08	09:15	No growth bacteria
NICU	6 (Environment)	Culture & ID (Infection Control)	201801054001060	2018-01-05	16:34	2018-01-08	09:16	No growth bacteria
NICU	7 (Environment)	Culture & ID (Infection Control)	201801054001070	2018-01-05	16:34	2018-01-08	09:16	No growth bacteria
NICU	8 (Environment)	Culture & ID (Infection Control)	201801054001080	2018-01-05	16:33	2018-01-08	09:15	No growth bacteria
NICU	9 (Environment)	Culture & ID (Infection Control)	201801054001090	2018-01-05	16:34	2018-01-08	09:16	No growth bacteria
NICU	10 (Environment)	Culture & ID (Infection Control)	201801054001000	2018-01-05	16:34	2018-01-08	09:16	No growth bacteria
